# Supplementary material for: Predicting aptamer sequences that interact with target proteins using an aptamer-protein interaction classifier and a Monte Carlo tree search approach
Source: PubMed Central journal article supplement (PMC8232527; doi:10.1371/journal.pone.0253760), 2021-06-25
Supplement: pone.0253760.s001.pdf [file pone.0253760.s001.pdf]

## S1 Appendix

### ID and sequences of the known aptamers in Table 2

| Aptamer-ID | Sequence (T→U)                                                                                  |
|------------|-------------------------------------------------------------------------------------------------|
| V1         | ATTGGGAAGGCGAGGTTGGGGACGCGGGGCGGTGGTGT                                                          |
| V2         | TGGGTGAGTGGGCGAGGGGTGAGGAGATGAAGGGCATGG                                                         |
| V9         | CAGGGGAGCGGCTGCACGGTTCTGCGGGGGAGGTTGGG                                                          |
| D1         | ACATGGGGGACGTCGGTCAGGGTAGGTTAGGGGAGAGA                                                          |
| CS1        | GGTCTCATAGGGTTCAAAGGCATTTGGTGTGAGAGCAGAG                                                        |
| CS2        | TGTGGGAATGTAGGCCGTGTTCCCATGCAGAGGCGATCGG                                                        |
| CS3        | TAAGGATTGATGGTGTGGGGCAGTCTGGTCCCATAGGGT                                                         |
| CS4        | CAATAATCTAACTGTCCCATGTTTCGGGTGTGTGGGAGAG                                                        |
| CS5        | GAAGAGGAATTGACGGTGTGAGTAGGCGTTCTCATAGGGT                                                        |
| CS6        | AACCTACAATGGTGTGGGTACCTCCTTCCCATAGGACCCG                                                        |
| CS7        | TATGGTCCCAATTGGTGTCTCTGTAGGGGAGTGGGAGCA                                                         |
| A1         | GCAUAAACAGCUGGUCCACCGCCGAUCAAGGCGAGAGCGC                                                        |
| A2         | GAUCCACCUAGGAGGGGUACAUCGCGGGGUCGCCGAUUA                                                         |
| A13        | GUCUUAGCUCUGCAGCCACGGAGGAGAGGGGAGGGCCGA                                                         |
| A16        | AACAAAGCAAGGAGGAGUGCUGCCGAUUCUGAAGGCCU                                                          |
| C3         | GGGAGAGGAGGGAGAUAGAUUACAACUGCAGGGUAGCACACGAAGGGCACCGUAGCAAUACGGU<br>UGUUCUGGUUAAACUUUCGUGGAUGCC |
| C3.59      | GGUAGCACACGAAGGGCAUCGUAGCAAUACGGUUGUUCUGGUUAAACUUUCGUGGAUGCC                                    |
| 5VOE:A     | GAGAGCCCCAGCGAGAUAAUACUUGGCCCCGCUCUU                                                            |
